# Supplementary material
Source: Elsevier journal article supplement (https://www.sciencedirect.com/science/article/pii/S234119291830132X)
Supplement: mmc1 [file S234119291830132X:mmc1.pdf]

## MATERIAL COMPLEMENTARIO.

### BRILMA MODIFICADO. ABORDAJE E IMAGEN ECOGRAFICA.

El bloqueo BRILMA modificado se realizó guiado por ultrasonidos (equipo portátil M-Turbo, Sonosite<sup>®</sup>, Bothell, WA, USA), utilizando una sonda lineal de alta frecuencia 6-15 Hz y aguja 80 mm Ultraplex<sup>®</sup> 360 (B. Braun<sup>®</sup>, Germany). Con el paciente en decúbito supino, se colocó la sonda en el plano sagital de la línea media axilar para identificar el plano fascial entre musculo serrato anterior y el intercostal externo. La aguja se introdujo de caudal a cefálica hasta situar la punta a nivel de la octava costilla, donde se administraron 3 ml de levobupivacaína 0,25% por dermatoma a analgesiar.

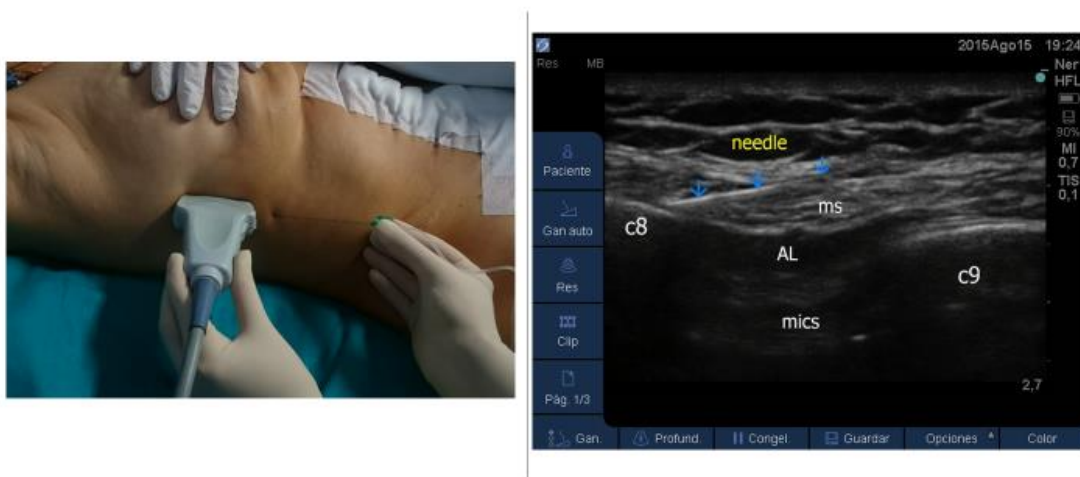

#### A. Abordaje en plano e Imagen ecográfica del bloqueo BRILMA modificado

ms (musc. Serrato), mics (musc intercostal), c8 (8ª costilla), AL (anestésico local). Las flechas muestran el trayecto de la aguja.
